# Supplementary material for: Detection of sulfur mustard simulant by trisaryl phosphoric triamide-based resin using a quartz crystal microbalance sensor
Source: Royal Society of Chemistry journal article supplement (doi:10.1039/d3ra08852a), 2024-01-01
Supplement: d3ra08852a1.pdf [file d3ra08852a1.pdf]

## *Electronic Supplementary Information*

### **Detection of Sulfur Mustard Simulant by Trisaryl Phosphoric Triamide-Based Resin Using Quartz Crystal Microbalance Sensor**

Jaeyoung Heo,<sup>a</sup> Jin Hyun Park,<sup>a</sup> Sun Gu Song,<sup>a</sup> Seongwoo Lee,<sup>b</sup> Seongyeop Lim,<sup>c</sup> Chang Young Lee,<sup>c</sup> Han Yong Bae<sup>a</sup> and Changsik Song. <sup>\*a</sup>

Department of Chemistry, Sungkyunkwan University, 2066, (16419);

\*E-mail : [songcs@skku.edu](mailto:songcs@skku.edu)

#### **Table of contents**

|                                                                                                  |       |           |
|--------------------------------------------------------------------------------------------------|-------|-----------|
| ✓ <b>Figure S1</b> QCM device and gas line depiction drawing                                     | ..... | <b>S2</b> |
| ✓ <b>Figure S2</b> FT-IR signal after the first synthesis process                                | ..... | <b>S3</b> |
| ✓ <b>Figure S3</b> FT-IR signal after the epoxy curing reaction                                  | ..... | <b>S4</b> |
| ✓ <b>Figure S4</b> QCM signal of receptors for 10ppm 2-CEES gas                                  | ..... | <b>S5</b> |
| ✓ The Langmuir-isotherm analysis for the response of the receptors                               | ..... | <b>S6</b> |
| ✓ <b>Figure S5.</b> Langmuir linear fitting data of receptors.                                   | ..... | <b>S7</b> |
| ✓ <b>Table S1.</b> $\Delta F_{\max}$ , K, $\Delta G^\circ$ , and $R^2$ values for the receptors. | ..... | <b>S7</b> |

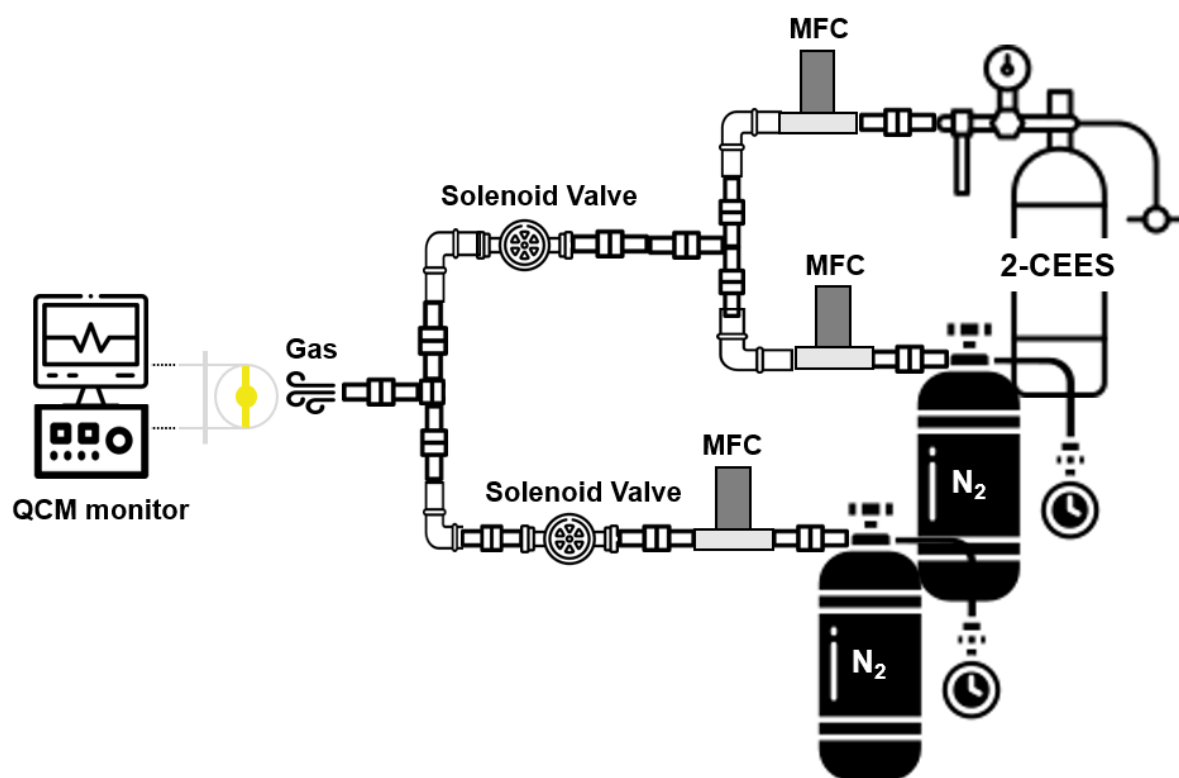

**Figure S1.** The custom-designed gas line and QCM setup employed for measuring 2-CEES gas in our experiments.

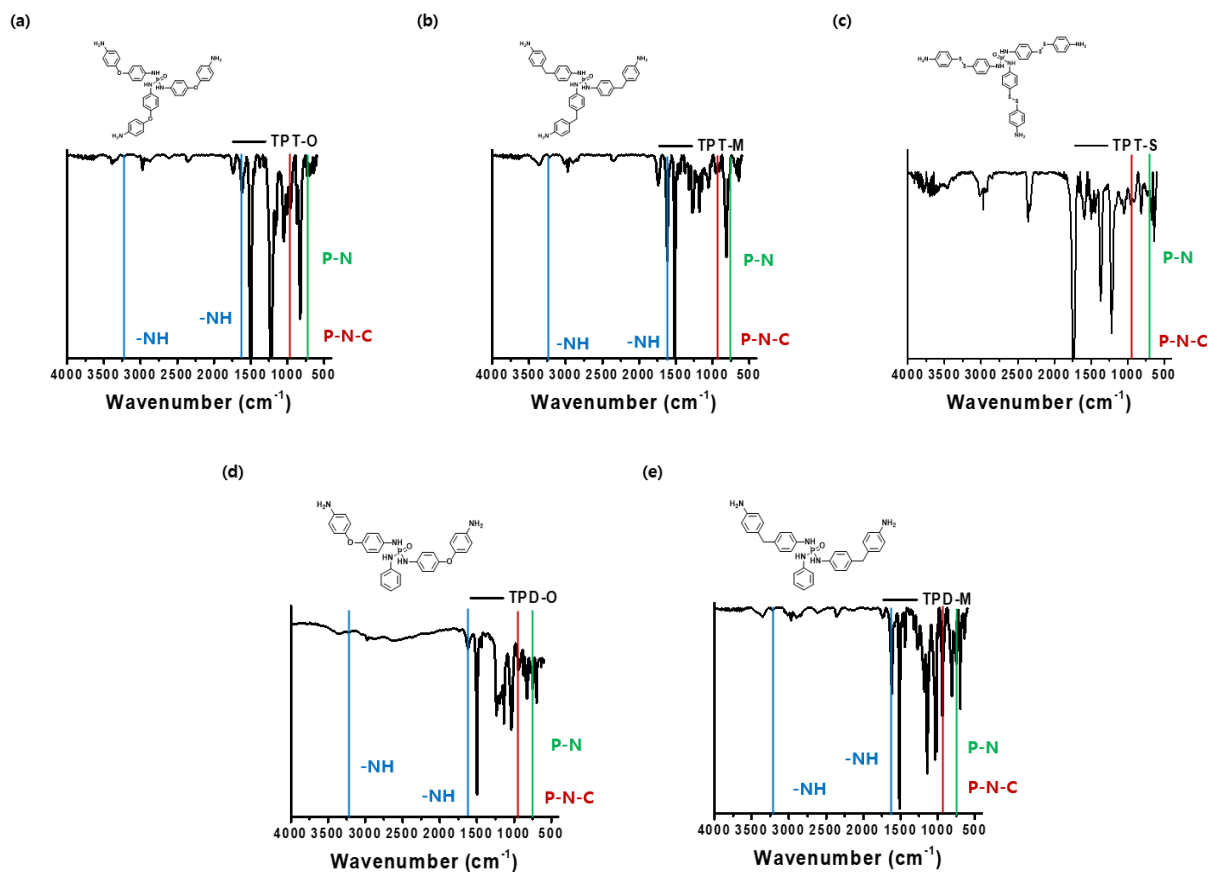

**Figure S2.** FT-IR spectra after the first synthetic process: (a) TPT-O, (b) TPT-M, (c) TPT-S, (d) TPD-O, and (e) TPD-M.. The absorption peaks were noted at  $954\text{ cm}^{-1}$ ,  $760\text{ cm}^{-1}$ ,  $1623\text{ cm}^{-1}$  and  $3215\text{ cm}^{-1}$  which were assigned for the bending vibration peaks of P-N-C, P-N, -NH, and the stretching vibration absorption of -NH, respectively.

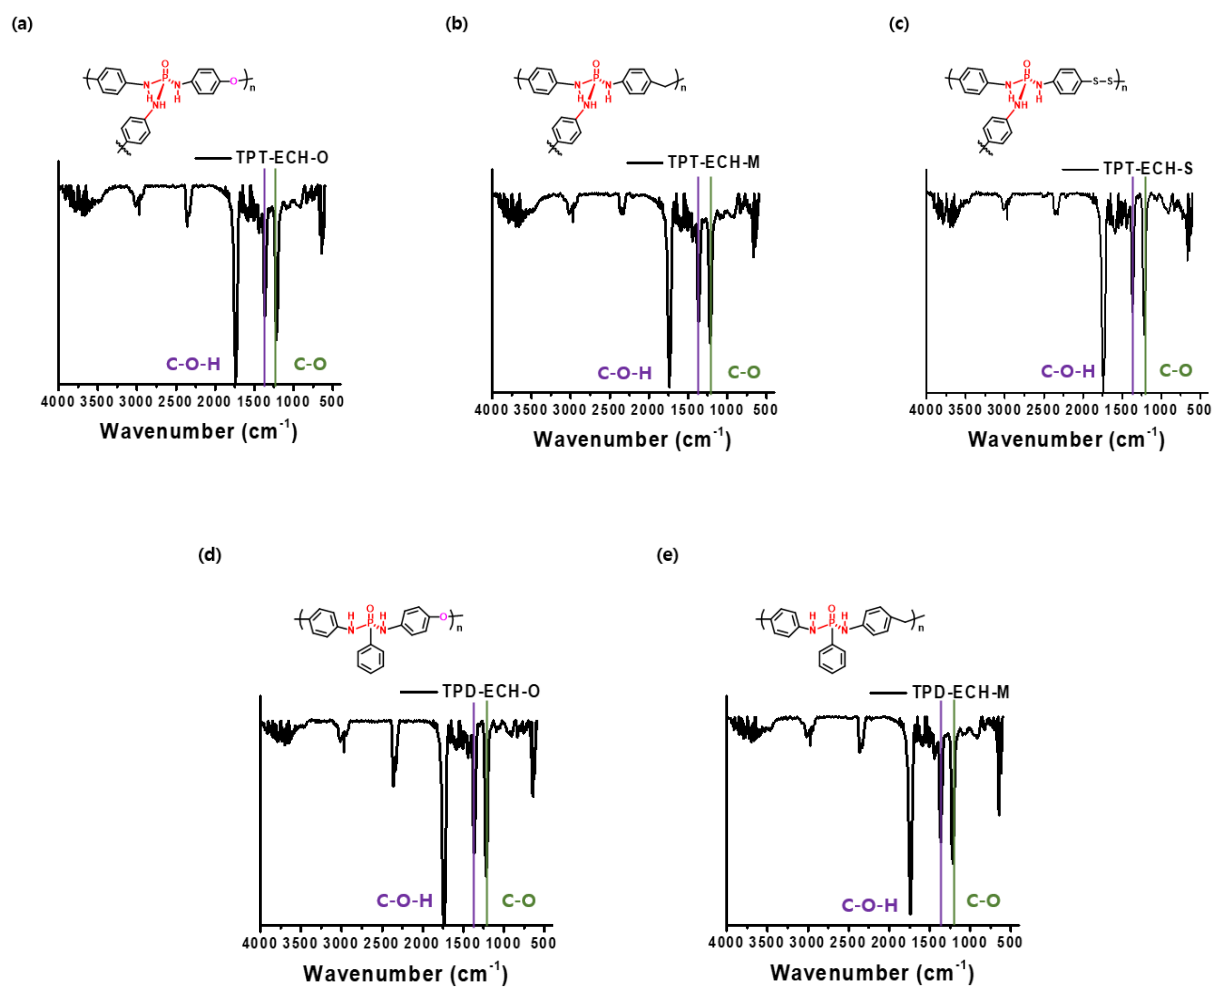

**Figure S3.** FT-IR spectra after the epoxy curing reaction: (a) TPT-ECH-O, (b) TPT-ECH-M, (c) TPT-ECH-S, (d) TPD-ECH-O, and (e) TPD-ECH-M. The absorption peaks were noted at  $1365\text{ cm}^{-1}$  and  $1221\text{ cm}^{-1}$  which were assigned for the bending vibration peaks of C-O-H and C-O, respectively.

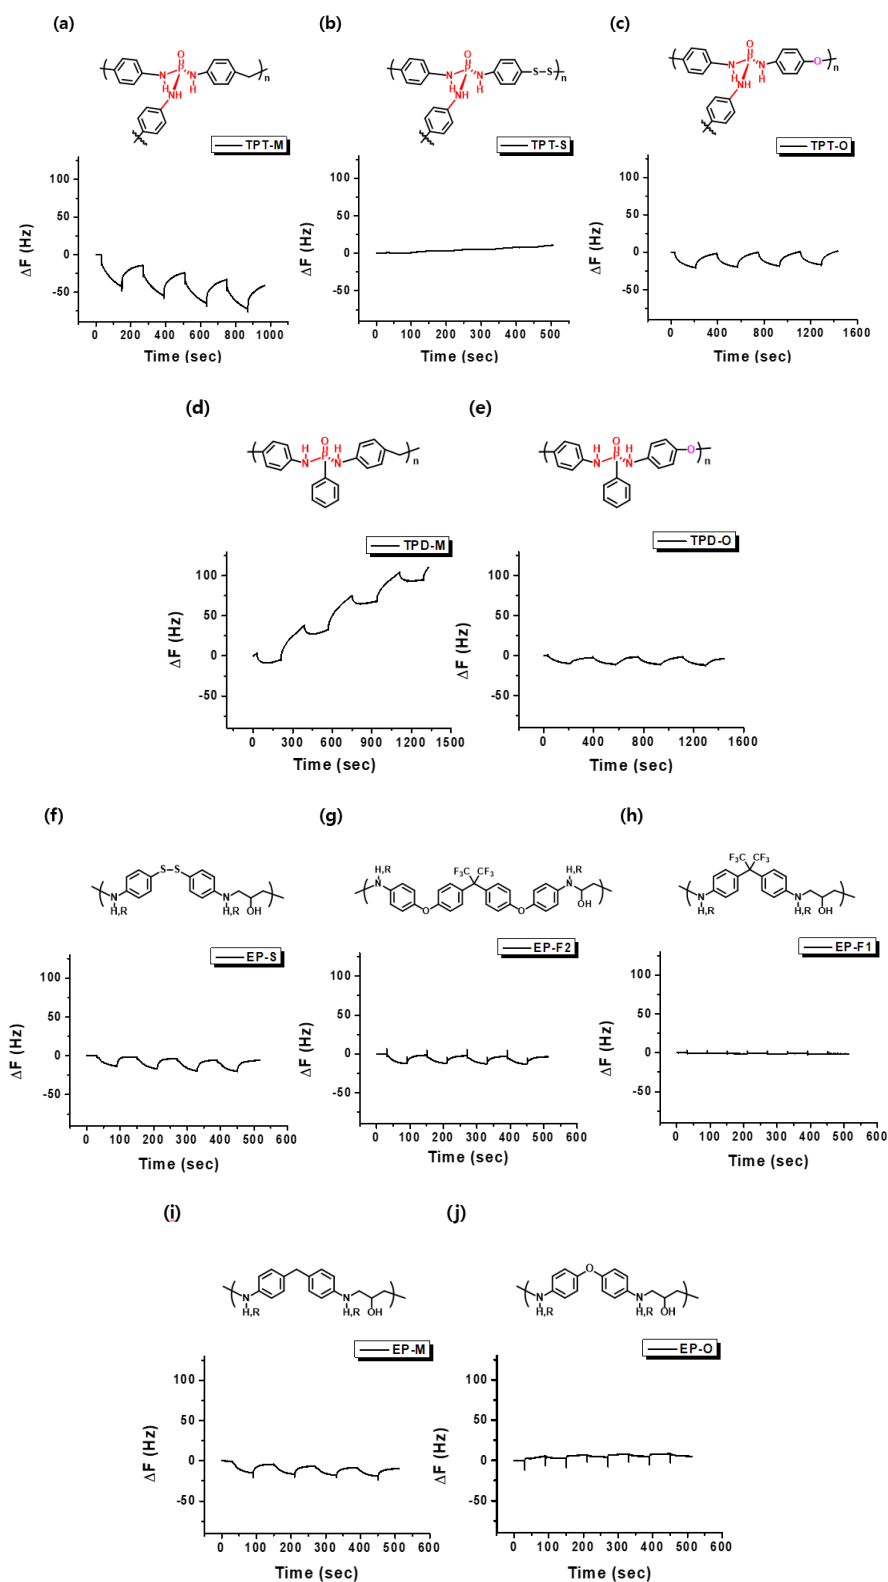

**Figure S4.** Comparison of QCM signals of TPT-M (a), TPT-S (b), TPT-O (c), TPD-M (d), TPD-O (e), EP-S (f), EP-F2 (g), EP-F1 (h), EP-M, and EP-O (j) for 10 ppm of 2-CEES gas.

### The Langmuir-isotherm analysis for the response of the receptors

The adsorption process of 2-CEES on each receptor can be described as follows, assuming non-dissociative adsorption of 2-CEES.

The equilibrium constant for 2-CEES adsorption ( $K$ ) can be expressed in relation to the surface coverage ( $\theta$ ) and partial pressure of 2-CEES ( $P$ ) as follows:

$$K = \frac{\theta}{(1-\theta)P}$$

Rearrangement of this equation gives,

$$\theta = \frac{KP}{1+KP}$$

and taking the reciprocal of both side of equation gives,

$$1/\theta = (1/K)(1/P) + 1$$

The surface coverage ( $\theta$ ) represents the ratio of adsorbed molecules on the surface to the number of molecules in a monolayer covering the surface sites, and it can be expressed in terms of  $\Delta F$  as follows:

$$\theta = \Delta F / \Delta F_{Max}$$

When  $\Delta F_{Max}$  represents the frequency change ( $\Delta F$ ) measured during QCM experiments when the receptor surface was fully covered with a monolayer of 2-CEES molecules, combining equations yields the linear relationship between ( $1/\Delta F$ ) and ( $1/P$ ) as follows:

$$1/\Delta F = (1/\Delta F_{Max} \times K)1/P + 1/\Delta F_{Max}$$

For each receptor case, the reciprocal of the 2-CEES concentration ( $1/P$ ) was plotted against the inverse of  $\Delta F$  ( $1/\Delta F$ ) at each 2-CEES concentration, and each dataset was fitted using the linear least squares regression method. From the slope ( $1/(\Delta F_{Max} \times K)$ ) and Y-axis intercept ( $1/\Delta F_{Max}$ ) of the line fitted to each dataset, the equilibrium constant ( $K$ ) of 2-CEES adsorption and  $\Delta F_{Max}$  values were derived.

Additionally, we computed the Gibbs free energy change ( $\Delta G^\circ$ ) of 2-CEES adsorption using the following equation:

$$\Delta G^\circ = -RT \ln K$$

Where  $R$  represents the gas constant ( $8.314 \text{ J/mol}\cdot\text{K}$ ),  $T$  denotes the absolute temperature in Kelvins, and  $K$  is the adsorption constant.

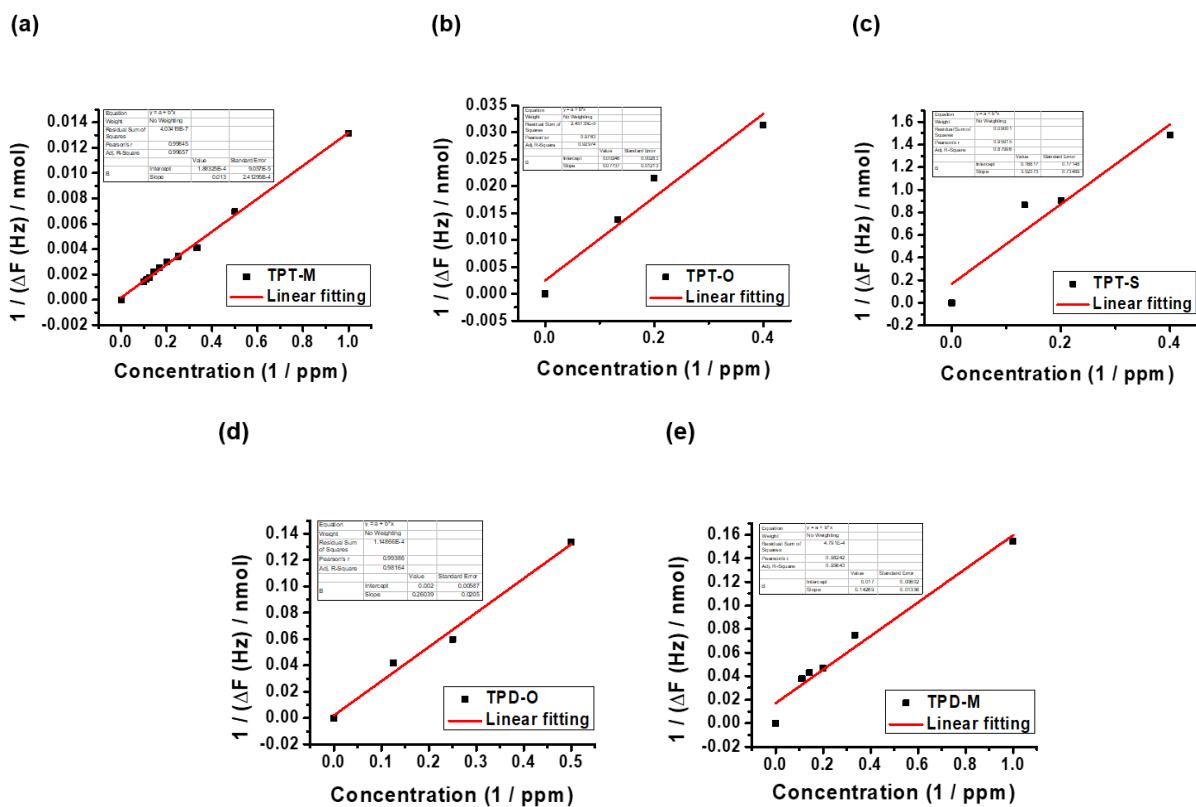

Figure S5. Langmuir linear fitting data of receptors.

|              | $\Delta F_{max}$ | $K$              | $\Delta G^\circ$ | $R^2$    |
|--------------|------------------|------------------|------------------|----------|
| <b>TPT-M</b> | $5.31 * 10^3$    | $1.42 * 10^{-2}$ | $2.47 * 10^3$    | 0.998745 |
| <b>TPT-O</b> | $4.03 * 10^2$    | $3.23 * 10^{-3}$ | $1.42 * 10^4$    | 0.92974  |
| <b>TPT-S</b> | $5.95 * 10^0$    | $4.71 * 10^{-2}$ | $7.58 * 10^3$    | 0.87998  |
| <b>TPD-O</b> | $5.00 * 10^2$    | $7.70 * 10^{-3}$ | $1.21 * 10^4$    | 0.98164  |
| <b>TPD-M</b> | $5.88 * 10^1$    | $1.19 * 10^{-1}$ | $5.25 * 10^3$    | 0.95653  |
| <b>EP-S</b>  | N/A              | N/A              | N/A              | N/A      |
| <b>EP-F2</b> | N/A              | N/A              | N/A              | N/A      |
| <b>EP-F1</b> | N/A              | N/A              | N/A              | N/A      |
| <b>EP-M</b>  | N/A              | N/A              | N/A              | N/A      |
| <b>EP-O</b>  | N/A              | N/A              | N/A              | N/A      |

Table S1. Langmuir isotherm fitting data of TPT-M receptor.
